# Supplementary material
Source: PubMed Central journal article supplement (PMC2048777)
Supplement: plntphys_pp.107.103101_2.pdf [file plntphys_pp.107.103101_2.pdf]

**Supplementary Table I.** Rate of dark respiration in the light (Rd) and values of CO<sub>2</sub> compensation point ( $\Gamma$ ) were determined as described by Häusler et al. (1999). CO<sub>2</sub> assimilation rates were measured at 22°C, relative humidity of 50% and limited PFDs (40, 80 and 120  $\mu\text{mol m}^{-2} \text{s}^{-1}$ ) under lower ambient CO<sub>2</sub> concentrations (50, 80, 100 and 200  $\mu\text{mol mol}^{-1}$ ). Values are presented as mean  $\pm$  SE of determination on five individual plants per line, with four to five weeks old at identical developmental stages, using fully developed source leaves.

|       | Rd                                                     | $\Gamma$                     |
|-------|--------------------------------------------------------|------------------------------|
|       | [ $\mu\text{mol CO}_2 \text{ m}^{-2} \text{ s}^{-1}$ ] | [ $\mu\text{mol mol}^{-1}$ ] |
| RL 25 | 1.36 $\pm$ 0.14                                        | 38.03 $\pm$ 1.93             |
| RL 40 | 1.44 $\pm$ 0.14                                        | 37.78 $\pm$ 2.06             |
| WT    | 1.31 $\pm$ 0.19                                        | 35.69 $\pm$ 1.67             |
