# Supplementary material
Source: PubMed Central journal article supplement (PMC2048777)
Supplement: plntphys_pp.107.103101_3.pdf [file plntphys_pp.107.103101_3.pdf]

**Supplementary Table II.** Nucleotides, phosphorylated intermediates and acetyl-CoA levels of fully expanded leaves from 8-week-old plants of the SCoAL transgenic lines. All metabolite analyses were performed from the same tissue samples. Data presented are mean  $\pm$  SE of determinations on six individual plants per genotype. Values set in bold type were determined by the *t*-test to be significantly different ( $P < 0.05$ ) from the wild type.

| Metabolite            | <i>nmol min<sup>-1</sup> gFW<sup>-1</sup></i> |            |              |                  |      |            |             |                  |
|-----------------------|-----------------------------------------------|------------|--------------|------------------|------|------------|-------------|------------------|
|                       | WT                                            |            | AL18         |                  | RL40 |            | RL25        |                  |
| Glc6P                 | 76.2                                          | $\pm$ 3.6  | <b>99.6</b>  | $\pm$ <b>4.6</b> | 67.7 | $\pm$ 10.4 | <b>94.9</b> | $\pm$ <b>5.8</b> |
| Glc1P                 | 20.6                                          | $\pm$ 2.1  | 16.4         | $\pm$ 1.7        | 13.4 | $\pm$ 2.5  | 22.5        | $\pm$ 2.6        |
| Fru6P                 | 17.9                                          | $\pm$ 2.0  | 23.6         | $\pm$ 2.1        | 17.8 | $\pm$ 2.9  | 17.2        | $\pm$ 2.8        |
| 3-PGA                 | 506                                           | $\pm$ 105  | 534          | $\pm$ 50         | 465  | $\pm$ 34   | 591         | $\pm$ 29         |
| Pi                    | 3.1                                           | $\pm$ 0.7  | 4.1          | $\pm$ 0.5        | 2.5  | $\pm$ 0.4  | 4.2         | $\pm$ 0.6        |
| $\Sigma$ hexose -P    | 115.8                                         | $\pm$ 7.3  | <b>144.1</b> | $\pm$ <b>3.1</b> | 98.7 | $\pm$ 14   | 132.7       | $\pm$ 8.8        |
| UDP-Gluc              | 26                                            | $\pm$ 1.6  | 26           | $\pm$ 0.5        | 26   | $\pm$ 1.0  | 27          | $\pm$ 1.1        |
| UDP                   | 44                                            | $\pm$ 4.5  | 50           | $\pm$ 4.5        | 43   | $\pm$ 3.3  | 33          | $\pm$ 2.3        |
| UTP                   | 11                                            | $\pm$ 0.6  | 10           | $\pm$ 0.6        | 11   | $\pm$ 0.5  | 13          | $\pm$ 0.3        |
| $\Sigma$ Uridinylates | 83                                            | $\pm$ 6.3  | 75           | $\pm$ 11.2       | 80   | $\pm$ 4.5  | 72          | $\pm$ 2.8        |
| UTP / UDP             | 0.3                                           | $\pm$ 0.03 | 0.2          | $\pm$ 0.03       | 0.3  | $\pm$ 0.02 | 0.4         | $\pm$ 0.03       |
| ADP                   | 6                                             | $\pm$ 0.5  | 4            | $\pm$ 0.4        | 6    | $\pm$ 0.4  | 5           | $\pm$ 0.6        |
| ATP                   | 18                                            | $\pm$ 1.6  | 17           | $\pm$ 0.9        | 16   | $\pm$ 0.8  | 19          | $\pm$ 0.9        |
| $\Sigma$ Adenylates   | 24                                            | $\pm$ 1.8  | 21           | $\pm$ 0.9        | 21   | $\pm$ 1.1  | 24          | $\pm$ 1.3        |
| ATP / ADP             | 3.1                                           | $\pm$ 0.4  | 4.0          | $\pm$ 0.4        | 2.9  | $\pm$ 0.2  | 4.0         | $\pm$ 0.3        |
| CDP                   | 55                                            | $\pm$ 4.3  | 53           | $\pm$ 2.6        | 54   | $\pm$ 1.9  | 49          | $\pm$ 4.1        |
| CTP                   | 2.6                                           | $\pm$ 0.4  | 2.5          | $\pm$ 0.3        | 2.5  | $\pm$ 0.4  | 2.6         | $\pm$ 0.3        |
| GDP                   | 5.8                                           | $\pm$ 0.9  | <b>3.2</b>   | $\pm$ <b>0.3</b> | 4.6  | $\pm$ 1.2  | 4.5         | $\pm$ 1.2        |
| GTP                   | 3.2                                           | $\pm$ 0.3  | 3.5          | $\pm$ 0.5        | 2.6  | $\pm$ 0.5  | 3.6         | $\pm$ 0.2        |
| Acetyl -CoA           | 7.7                                           | $\pm$ 1.0  | 6.9          | $\pm$ 0.5        | 7.3  | $\pm$ 1.0  | 8.4         | $\pm$ 0.7        |
| CoASH                 | 2.0                                           | $\pm$ 0.3  | 1.8          | $\pm$ 0.3        | 1.8  | $\pm$ 0.6  | 2.0         | $\pm$ 0.5        |
| Total CoA             | 9.7                                           | $\pm$ 1.3  | 8.7          | $\pm$ 1.1        | 9.1  | $\pm$ 0.8  | 10.4        | $\pm$ 0.4        |
