# Supplementary material
Source: PubMed Central journal article supplement (PMC2048777)
Supplement: plntphys_pp.107.103101_4.pdf [file plntphys_pp.107.103101_4.pdf]

**Supplementary Table III.** Relative metabolite content of fully expanded leaves from 8-week-old plants of the SCoAL transgenic lines. Metabolites were determined as described in the Materials and Methods. Data are normalised with respect to the mean response calculated for the wild type. Values are presented as mean  $\pm$  SE of determinations on six individual plants per line. Values set in bold type were determined by the *t*-test to be significantly different ( $P < 0.05$ ) from the wild type. nd means not determined.

| Metabolites                       | WT              | AL18                              | RL40            | RL25                              |
|-----------------------------------|-----------------|-----------------------------------|-----------------|-----------------------------------|
| <i>Amino-acids</i>                |                 |                                   |                 |                                   |
| Asparagine                        | 1.00 $\pm$ 0.30 | 0.43 $\pm$ 0.12                   | nd              | 1.88 $\pm$ 0.31                   |
| Aspartate                         | 1.00 $\pm$ 0.28 | 0.62 $\pm$ 0.19                   | 1.10 $\pm$ 0.19 | 1.10 $\pm$ 0.20                   |
| $\beta$ -alanine                  | 1.00 $\pm$ 0.16 | 0.77 $\pm$ 0.15                   | nd              | 1.04 $\pm$ 0.14                   |
| Cysteine                          | 1.00 $\pm$ 0.13 | 1.41 $\pm$ 0.11                   | nd              | 1.17 $\pm$ 0.09                   |
| Glutamine                         | 1.00 $\pm$ 0.31 | 0.44 $\pm$ 0.20                   | 1.33 $\pm$ 0.26 | 1.09 $\pm$ 0.26                   |
| Glycine                           | 1.00 $\pm$ 0.13 | 1.20 $\pm$ 0.13                   | 1.04 $\pm$ 0.06 | 1.37 $\pm$ 0.13                   |
| Isoleucine                        | 1.00 $\pm$ 0.14 | 0.98 $\pm$ 0.10                   | 1.17 $\pm$ 0.13 | 1.44 $\pm$ 0.18                   |
| Leucine                           | 1.00 $\pm$ 0.17 | 1.26 $\pm$ 0.14                   | 1.18 $\pm$ 0.13 | 1.57 $\pm$ 0.19                   |
| Serine                            | 1.00 $\pm$ 0.17 | 0.86 $\pm$ 0.20                   | 1.00 $\pm$ 0.12 | 1.22 $\pm$ 0.16                   |
| Threonine                         | 1.00 $\pm$ 0.12 | 0.78 $\pm$ 0.05                   | 1.04 $\pm$ 0.10 | 1.02 $\pm$ 0.15                   |
| Tryptophan                        | 1.00 $\pm$ 0.21 | 1.30 $\pm$ 0.15                   | 0.84 $\pm$ 0.12 | 1.17 $\pm$ 0.35                   |
| Tyrosine                          | 1.00 $\pm$ 0.25 | 1.62 $\pm$ 0.22                   | 1.30 $\pm$ 0.13 | 1.38 $\pm$ 0.24                   |
| Valine                            | 1.00 $\pm$ 0.12 | 1.09 $\pm$ 0.10                   | 1.13 $\pm$ 0.09 | 1.38 $\pm$ 0.19                   |
| <i>Organic acids</i>              |                 |                                   |                 |                                   |
| Citramalate                       | 1.00 $\pm$ 0.15 | 1.06 $\pm$ 0.08                   | 0.86 $\pm$ 0.30 | 1.12 $\pm$ 0.16                   |
| Dehydroascorbate                  | 1.00 $\pm$ 0.26 | 1.40 $\pm$ 0.08                   | 0.97 $\pm$ 0.11 | 1.13 $\pm$ 0.13                   |
| Galacturonate                     | 1.00 $\pm$ 0.34 | 0.28 $\pm$ 0.33                   | nd              | 1.19 $\pm$ 0.21                   |
| Gluconate                         | 1.00 $\pm$ 0.26 | 1.24 $\pm$ 0.17                   | 1.61 $\pm$ 0.16 | 1.90 $\pm$ 0.15                   |
| Glycerate                         | 1.00 $\pm$ 0.25 | 1.03 $\pm$ 0.16                   | 1.01 $\pm$ 0.09 | 1.13 $\pm$ 0.19                   |
| Maleate                           | 1.00 $\pm$ 0.20 | 1.80 $\pm$ 0.15                   | 1.23 $\pm$ 0.12 | 1.09 $\pm$ 0.13                   |
| Nicotinate                        | 1.00 $\pm$ 0.25 | 0.92 $\pm$ 0.14                   | 1.09 $\pm$ 0.06 | 1.14 $\pm$ 0.16                   |
| Saccharate                        | 1.00 $\pm$ 0.18 | 0.72 $\pm$ 0.09                   | 0.94 $\pm$ 0.15 | 0.35 $\pm$ 0.02                   |
| Shikimate                         | 1.00 $\pm$ 0.06 | 1.21 $\pm$ 0.11                   | 1.09 $\pm$ 0.08 | 1.34 $\pm$ 0.12                   |
| Threonate                         | 1.00 $\pm$ 0.23 | 1.17 $\pm$ 0.10                   | 1.26 $\pm$ 0.06 | 1.18 $\pm$ 0.08                   |
| <i>Sugars and sugars alcohols</i> |                 |                                   |                 |                                   |
| Arabinose                         | 1.00 $\pm$ 0.18 | 0.91 $\pm$ 0.20                   | 0.84 $\pm$ 0.16 | 1.21 $\pm$ 0.24                   |
| Fructose                          | 1.00 $\pm$ 0.16 | 0.79 $\pm$ 0.09                   | 0.96 $\pm$ 0.09 | 0.76 $\pm$ 0.14                   |
| Galactose                         | 1.00 $\pm$ 0.12 | 0.90 $\pm$ 0.16                   | 0.91 $\pm$ 0.09 | 1.36 $\pm$ 0.18                   |
| Glucose                           | 1.00 $\pm$ 0.22 | 0.61 $\pm$ 0.13                   | 0.78 $\pm$ 0.12 | 0.66 $\pm$ 0.22                   |
| Glycerol                          | 1.00 $\pm$ 0.08 | 0.78 $\pm$ 0.10                   | 1.04 $\pm$ 0.02 | 1.02 $\pm$ 0.05                   |
| Inositol                          | 1.00 $\pm$ 0.11 | 1.02 $\pm$ 0.03                   | 0.92 $\pm$ 0.06 | 1.25 $\pm$ 0.12                   |
| Isomaltose                        | 1.00 $\pm$ 0.15 | 1.10 $\pm$ 0.08                   | 1.13 $\pm$ 0.09 | 0.98 $\pm$ 0.13                   |
| Maltose                           | 1.00 $\pm$ 0.11 | 1.04 $\pm$ 0.17                   | 0.98 $\pm$ 0.02 | 1.02 $\pm$ 0.10                   |
| Mannitol                          | 1.00 $\pm$ 0.19 | <b>0.33 <math>\pm</math> 0.08</b> | 1.12 $\pm$ 0.09 | <b>0.33 <math>\pm</math> 0.12</b> |
| Mannose                           | 1.00 $\pm$ 0.25 | 0.68 $\pm$ 0.24                   | 1.04 $\pm$ 0.19 | 0.80 $\pm$ 0.15                   |
| Rhamnose                          | 1.00 $\pm$ 0.12 | 0.85 $\pm$ 0.04                   | 0.97 $\pm$ 0.10 | 1.04 $\pm$ 0.12                   |
| Sucrose                           | 1.00 $\pm$ 0.12 | 1.13 $\pm$ 0.12                   | 1.02 $\pm$ 0.05 | 1.15 $\pm$ 0.04                   |
| Trehalose                         | 1.00 $\pm$ 0.14 | 1.57 $\pm$ 0.38                   | 1.76 $\pm$ 0.11 | 1.22 $\pm$ 0.14                   |
| Xylose                            | 1.00 $\pm$ 0.15 | 0.71 $\pm$ 0.17                   | 0.83 $\pm$ 0.12 | 1.13 $\pm$ 0.26                   |
| <i>Others</i>                     |                 |                                   |                 |                                   |
| Dopamine                          | 1.00 $\pm$ 0.25 | 1.41 $\pm$ 0.05                   | 0.96 $\pm$ 0.16 | 1.71 $\pm$ 0.08                   |
| Tyramine                          | 1.00 $\pm$ 0.11 | 1.28 $\pm$ 0.11                   | 1.25 $\pm$ 0.11 | 1.18 $\pm$ 0.20                   |
| Pyroglutamic                      | 1.00 $\pm$ 0.14 | 0.81 $\pm$ 0.08                   | 0.99 $\pm$ 0.10 | 1.32 $\pm$ 0.10                   |
