# Supplementary material
Source: PubMed Central journal article supplement (PMC2048777)
Supplement: plntphys_pp.107.103101_5.pdf [file plntphys_pp.107.103101_5.pdf]

**Supplementary Table IV** Parameters measured on a different set of plants incorporating a second strongly reduced line (RL34). For enzymatic activities refer to legend to Table 1. For  $^{14}\text{CO}_2$  assimilation refer to legend to Figure 3. For flux estimation refer to legend to Figure 6B. Metabolites were determined as described in the Materials and Methods. Values are presented as mean  $\pm$  SE of determinations on six individual plants per line. Values set in bold type were assessed by *t*-tests ( $P < 0.05$ ) to be significantly different from wild type.

|                                      | WT                                                                                                                                | RL34                           | RL25                            | AL40                 | AL18               | AL10                |
|--------------------------------------|-----------------------------------------------------------------------------------------------------------------------------------|--------------------------------|---------------------------------|----------------------|--------------------|---------------------|
| Enzymatic activities                 | <i>nmol min<sup>-1</sup> gFW<sup>-1</sup></i>                                                                                     |                                |                                 |                      |                    |                     |
| ScoAL                                | 264.12 $\pm$ 28.48                                                                                                                | <b>11.50</b> $\pm$ <b>1.62</b> | <b>79.11</b> $\pm$ <b>14.72</b> | 228.98 $\pm$ 21.03   | 192.98 $\pm$ 22.64 | 211.44 $\pm$ 6.99   |
| GAD                                  | 1.52 $\pm$ 0.24                                                                                                                   | <b>2.69</b> $\pm$ <b>0.41</b>  | <b>3.36</b> $\pm$ <b>0.23</b>   | 2.23 $\pm$ 0.24      | 2.16 $\pm$ 0.41    | 1.99 $\pm$ 0.25     |
| Flux [1- $^{14}\text{C}$ ]-glutamate | <i>(% of total <math>^{14}\text{C}</math> applied) min<sup>-1</sup> mgFW<sup>-1</sup></i>                                         |                                |                                 |                      |                    |                     |
| $^{14}\text{CO}_2$ assimilation      | <i><math>^{14}\text{CO}_2</math> released (Proportion of <math>^{14}\text{C}</math> applied g FW<sup>-1</sup> h<sup>-1</sup>)</i> |                                |                                 |                      |                    |                     |
|                                      | 2.65 $\pm$ 0.21                                                                                                                   | <b>4.22</b> $\pm$ 0.28         | <b>3.71</b> $\pm$ 0.17          | 3.03 $\pm$ 0.27      | 2.53 $\pm$ 0.33    | 2.41 $\pm$ 0.22     |
|                                      | <i>Label incorporated (DPM g FW<sup>-1</sup>)</i>                                                                                 |                                |                                 |                      |                    |                     |
|                                      | 2212.66 $\pm$ 91.27                                                                                                               | 3356.36 $\pm$ 517.15           | 2375.50 $\pm$ 317.67            | 2328.43 $\pm$ 205.82 |                    | 2444.08 $\pm$ 92.60 |
| Metabolites                          | <i>Normalized peak area g FW<sup>-1</sup></i>                                                                                     |                                |                                 |                      |                    |                     |
| Citrate                              | 1.00 $\pm$ 0.14                                                                                                                   | 1.03 $\pm$ 0.10                |                                 |                      |                    |                     |
| 2-OG                                 | 1.00 $\pm$ 0.16                                                                                                                   | <b>3.63</b> $\pm$ <b>0.61</b>  |                                 |                      |                    |                     |
| Succinate                            | 1.00 $\pm$ 0.26                                                                                                                   | <b>0.51</b> $\pm$ <b>0.08</b>  |                                 |                      |                    |                     |
| Fumarate                             | 1.00 $\pm$ 0.09                                                                                                                   | <b>0.75</b> $\pm$ <b>0.05</b>  |                                 |                      |                    |                     |
| Malate                               | 1.00 $\pm$ 0.18                                                                                                                   | <b>0.77</b> $\pm$ <b>0.12</b>  |                                 |                      |                    |                     |
| Ala                                  | 1.00 $\pm$ 0.15                                                                                                                   | 1.13 $\pm$ 0.05                |                                 |                      |                    |                     |
| GABA                                 | 1.00 $\pm$ 0.21                                                                                                                   | <b>1.40</b> $\pm$ <b>0.07</b>  |                                 |                      |                    |                     |
| Glu                                  | 1.00 $\pm$ 0.02                                                                                                                   | <b>1.49</b> $\pm$ <b>0.05</b>  |                                 |                      |                    |                     |
| Phe                                  | 1.00 $\pm$ 0.22                                                                                                                   | 1.29 $\pm$ 0.08                |                                 |                      |                    |                     |
| Pro                                  | 1.00 $\pm$ 0.31                                                                                                                   | 0.79 $\pm$ 0.30                |                                 |                      |                    |                     |
